# Supplementary material
Source: Springer Nature journal article supplement (https://www.springermedizin.de/resource/supplementary/12937_2006_108_MOESM4_ESM.pdf/25654414)

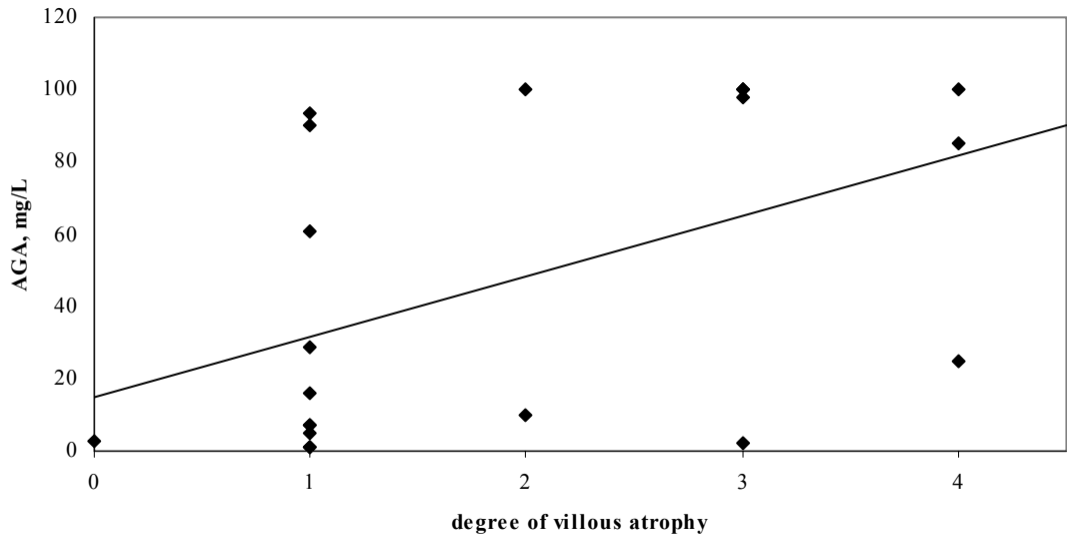

Supplement: MOESM4 [file 25654414]
